# Supplementary material for: Spatial variation in cause-specific premature mortality and its association with socioeconomic deprivation in Belgium from 2000 to 2019
Source: Research Square preprint supplement (doi:10.21203/rs.3.rs-5611920/v1), 2025-04-23
Supplement: Supplementary file 1 [file 3dfa5b503e9bc088bf6abba8.docx]

Supplement to:

Otavova M, Masquelier B, Faes C, Bouland C, De Clercq E M, Vandeninden B, Devleesschauwer B, Schlüter B.-S, Spatial variation in cause-specific premature mortality and its association with deprivation in Belgium from 2000 to 2019

Contents

[Methods 2](#_Toc184657841)

[Results 4](#_Toc184657842)

[Which geographical areas exhibit the highest risk of dying prematurely? 4](#_Toc184657843)

[Is the subnational variation in cause-specific risk of premature death decreasing or increasing? 14](#_Toc184657844)

[What effects do overall socioeconomic deprivation or domain-specific deprivation have on subnational variations in the cause-specific risk of premature death? 16](#_Toc184657845)

# Methods


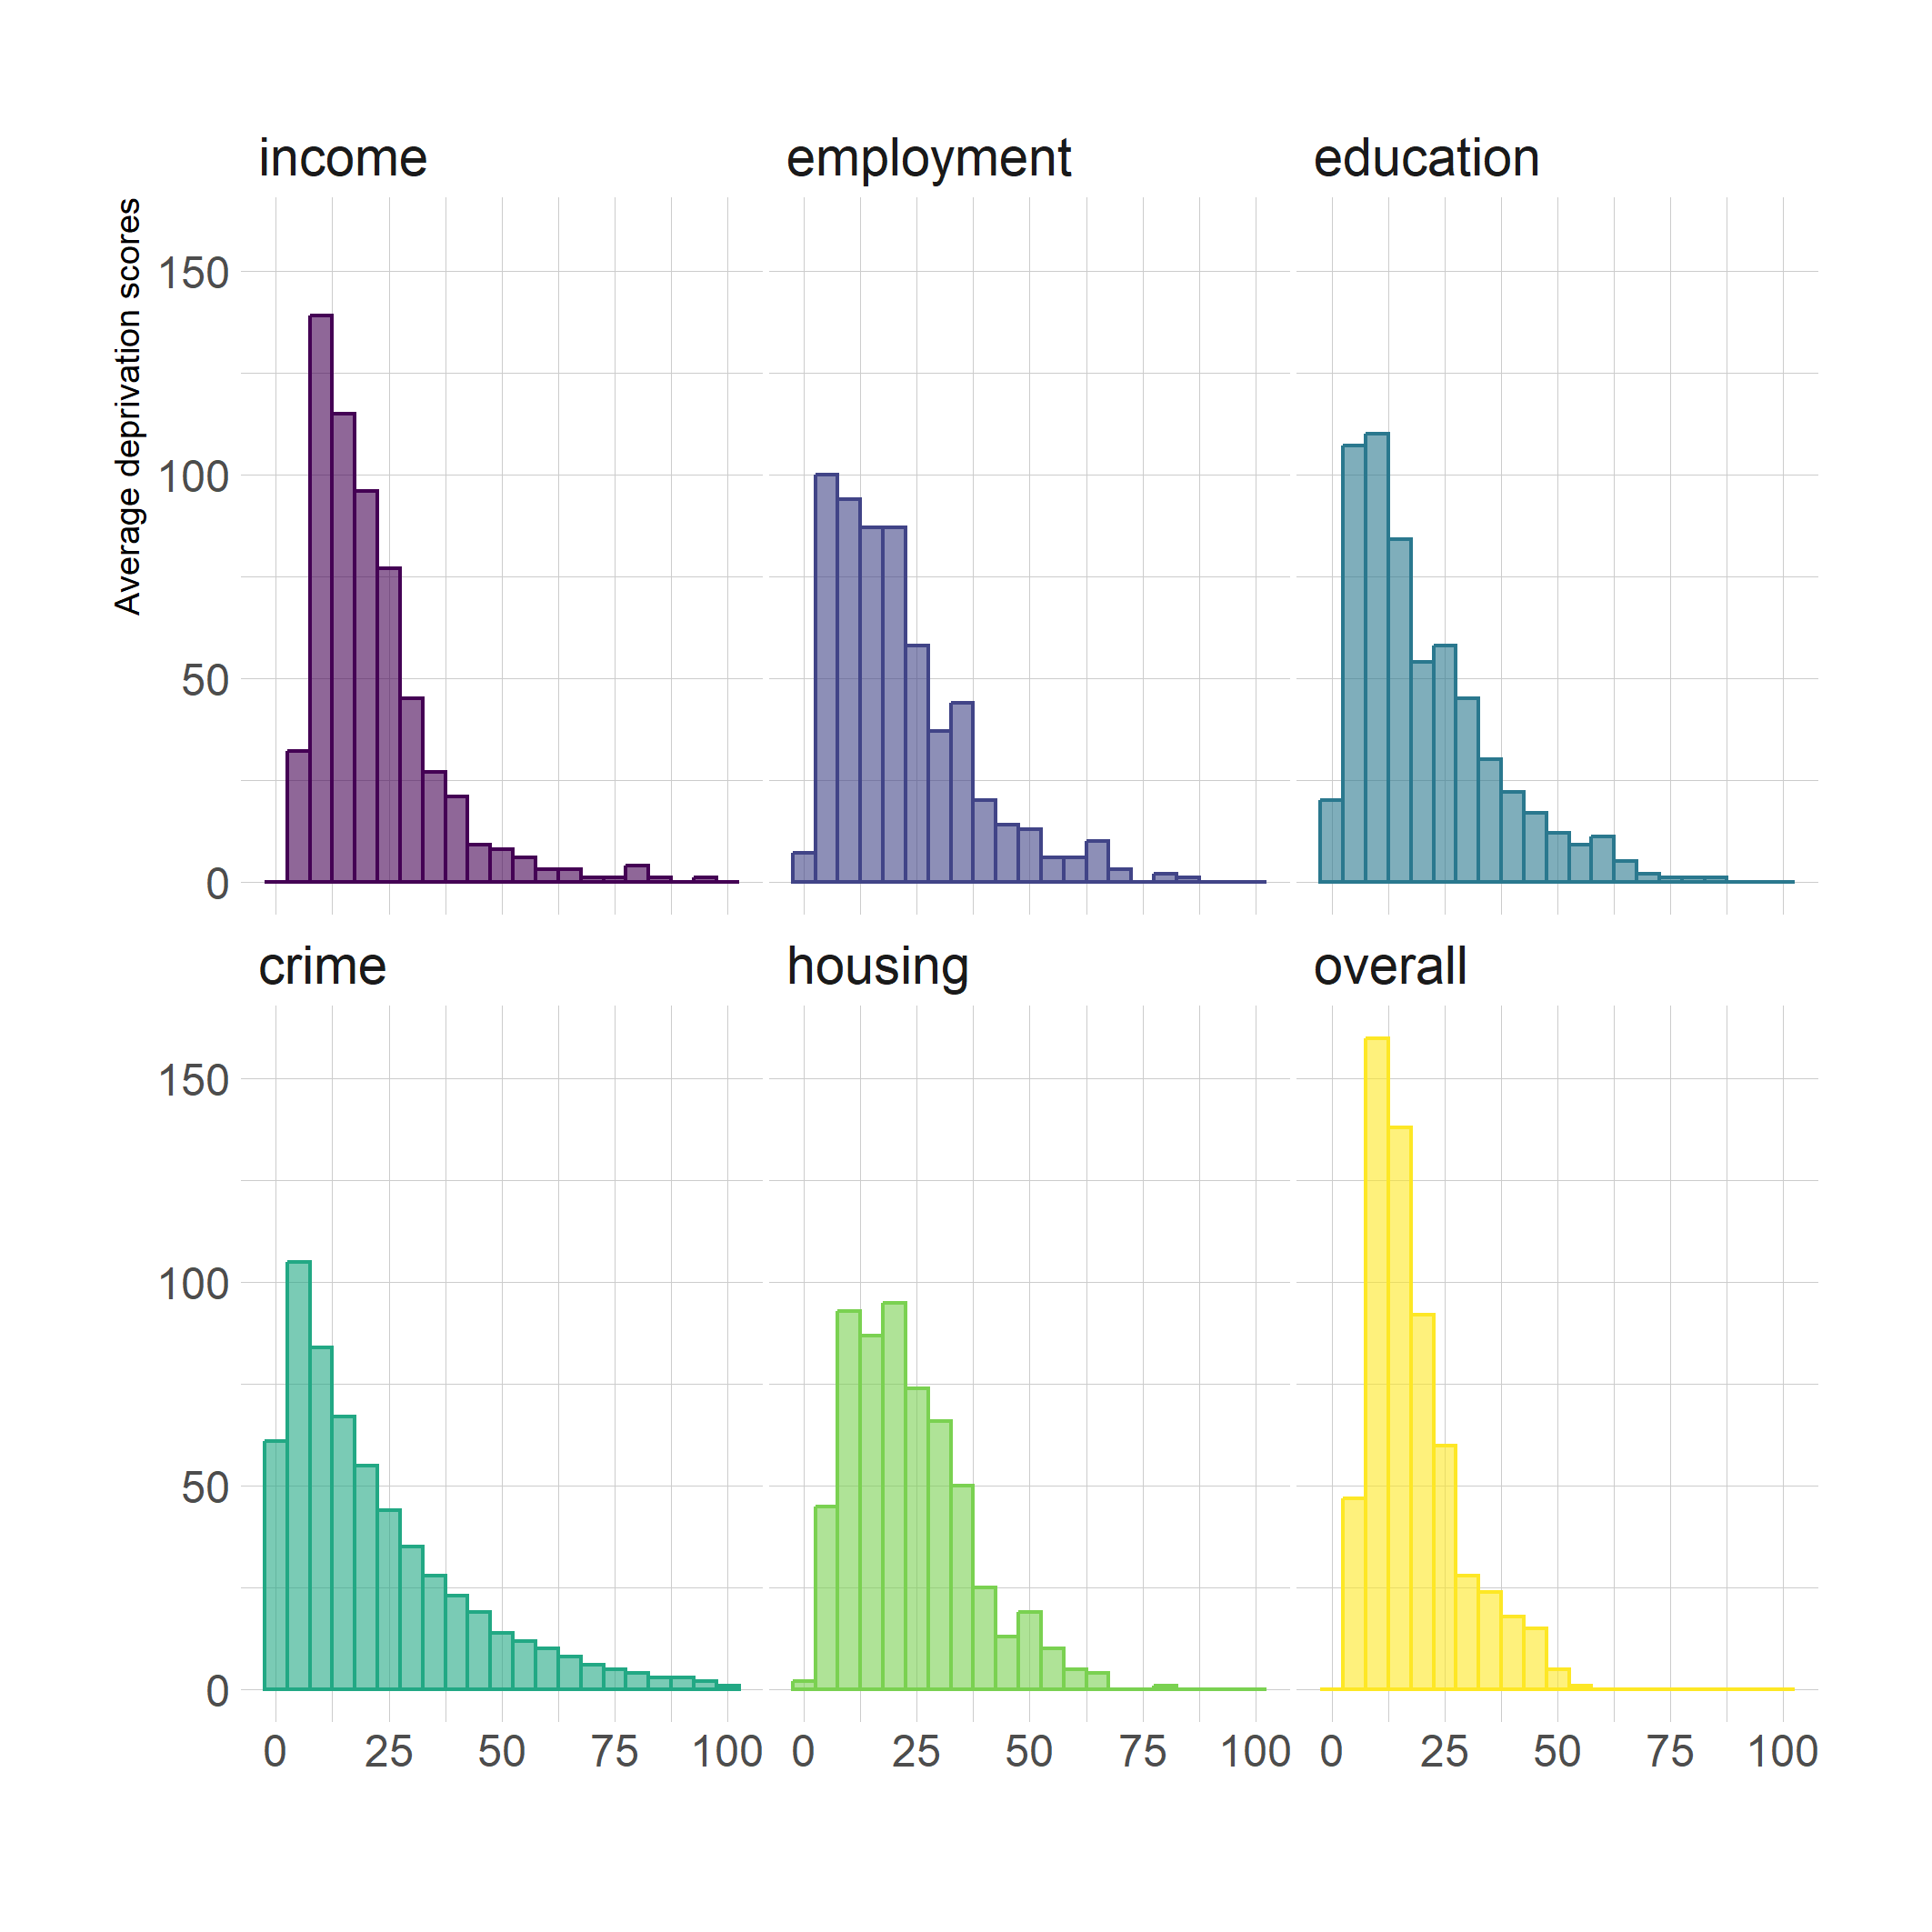


Figure S1 Distribution of overall and domain-specific average deprivation scores

Table S1 Summary measures of domain-specific average deprivation scores

| **Domain-specific deprivation scores** | **Min** | **Max** | **SD** |
| --- | --- | --- | --- |
| Employment | 0.56 | 83.83 | 15.26 |
| Income | 4.51 | 94.14 | 13.31 |
| Education | 0.14 | 86.65 | 15.61 |
| Housing | 2.33 | 78.72 | 13.11 |
| Crime | 0.04 | 100 | 20.05 |

# Results

## In which geographical areas is the risk of premature death the highest?


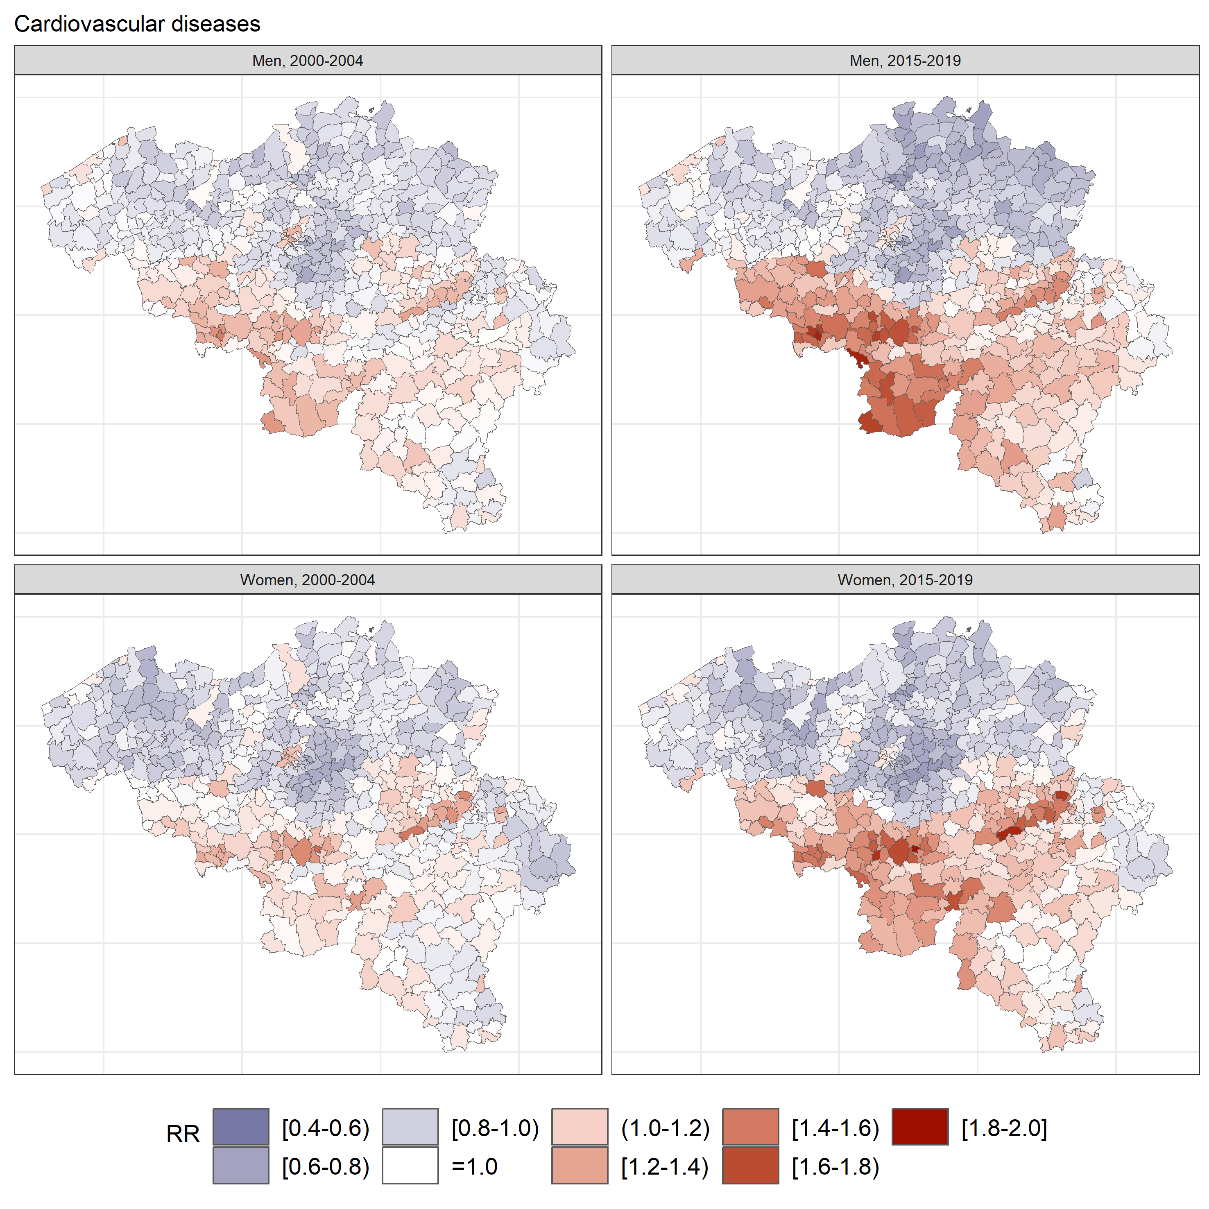


Figure S2 Spatial and temporal patterns of relative risk for premature mortality due to cardiovascular diseases in Belgium during the first (2000–2004) and last (2015–2019) study periods, by sex.


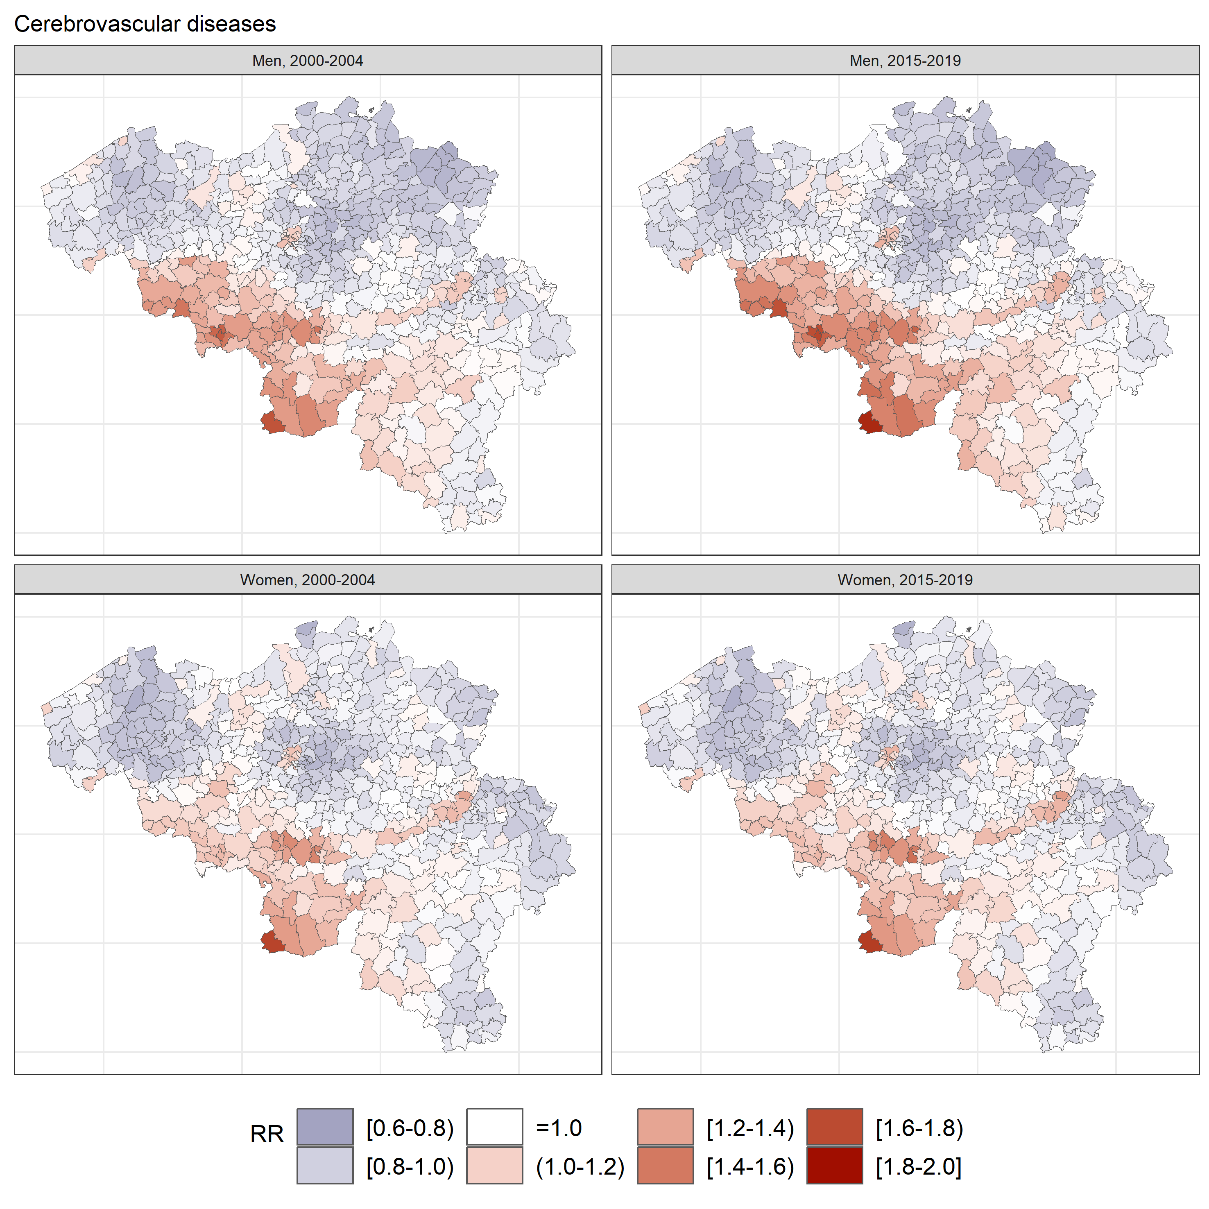


Figure S3 Spatial and temporal distribution of RR of premature mortality due to cerebrovascular diseases in Belgium in the first (2000-2004) and last period (2015-2019) studied, by sex.


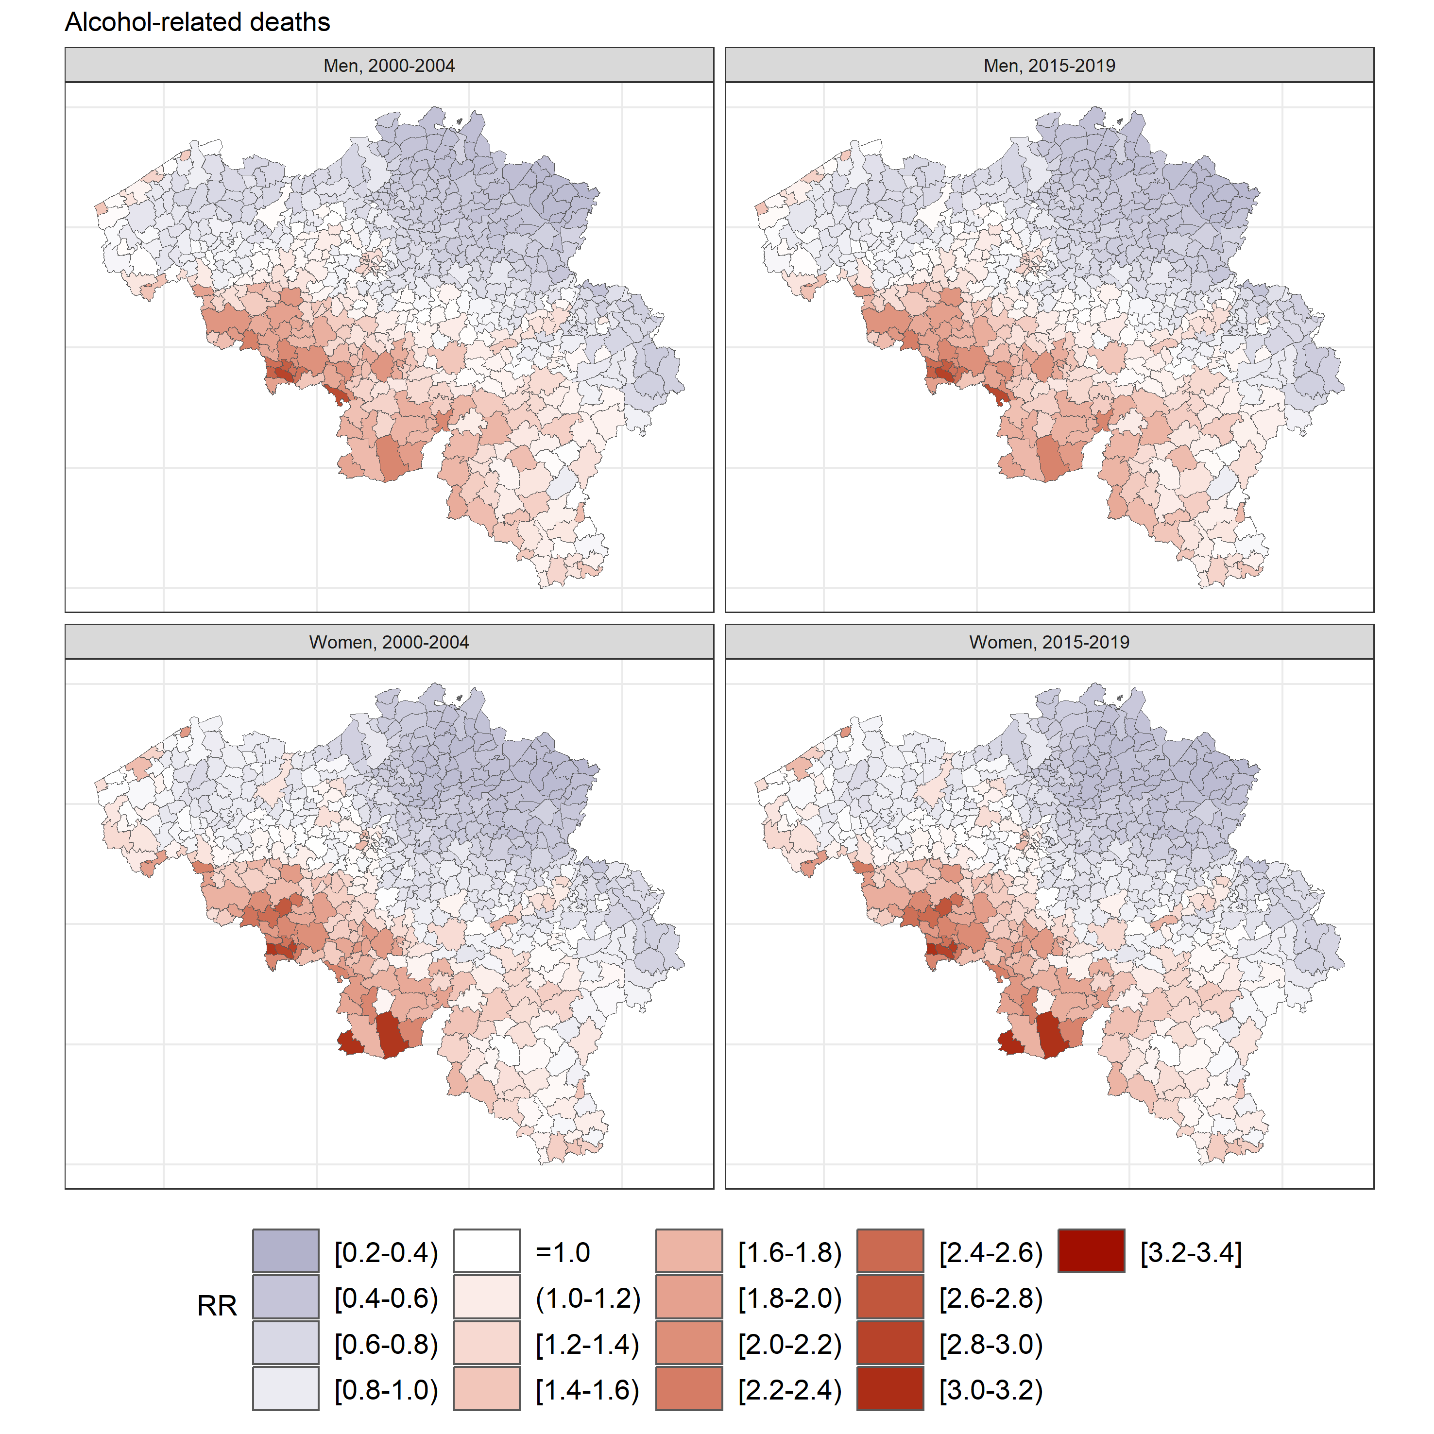


Figure S4 Spatial and temporal distribution of RR of premature mortality due to alcohol-related deaths in Belgium in the first (2000-2004) and last period (2015-2019) studied, by sex.


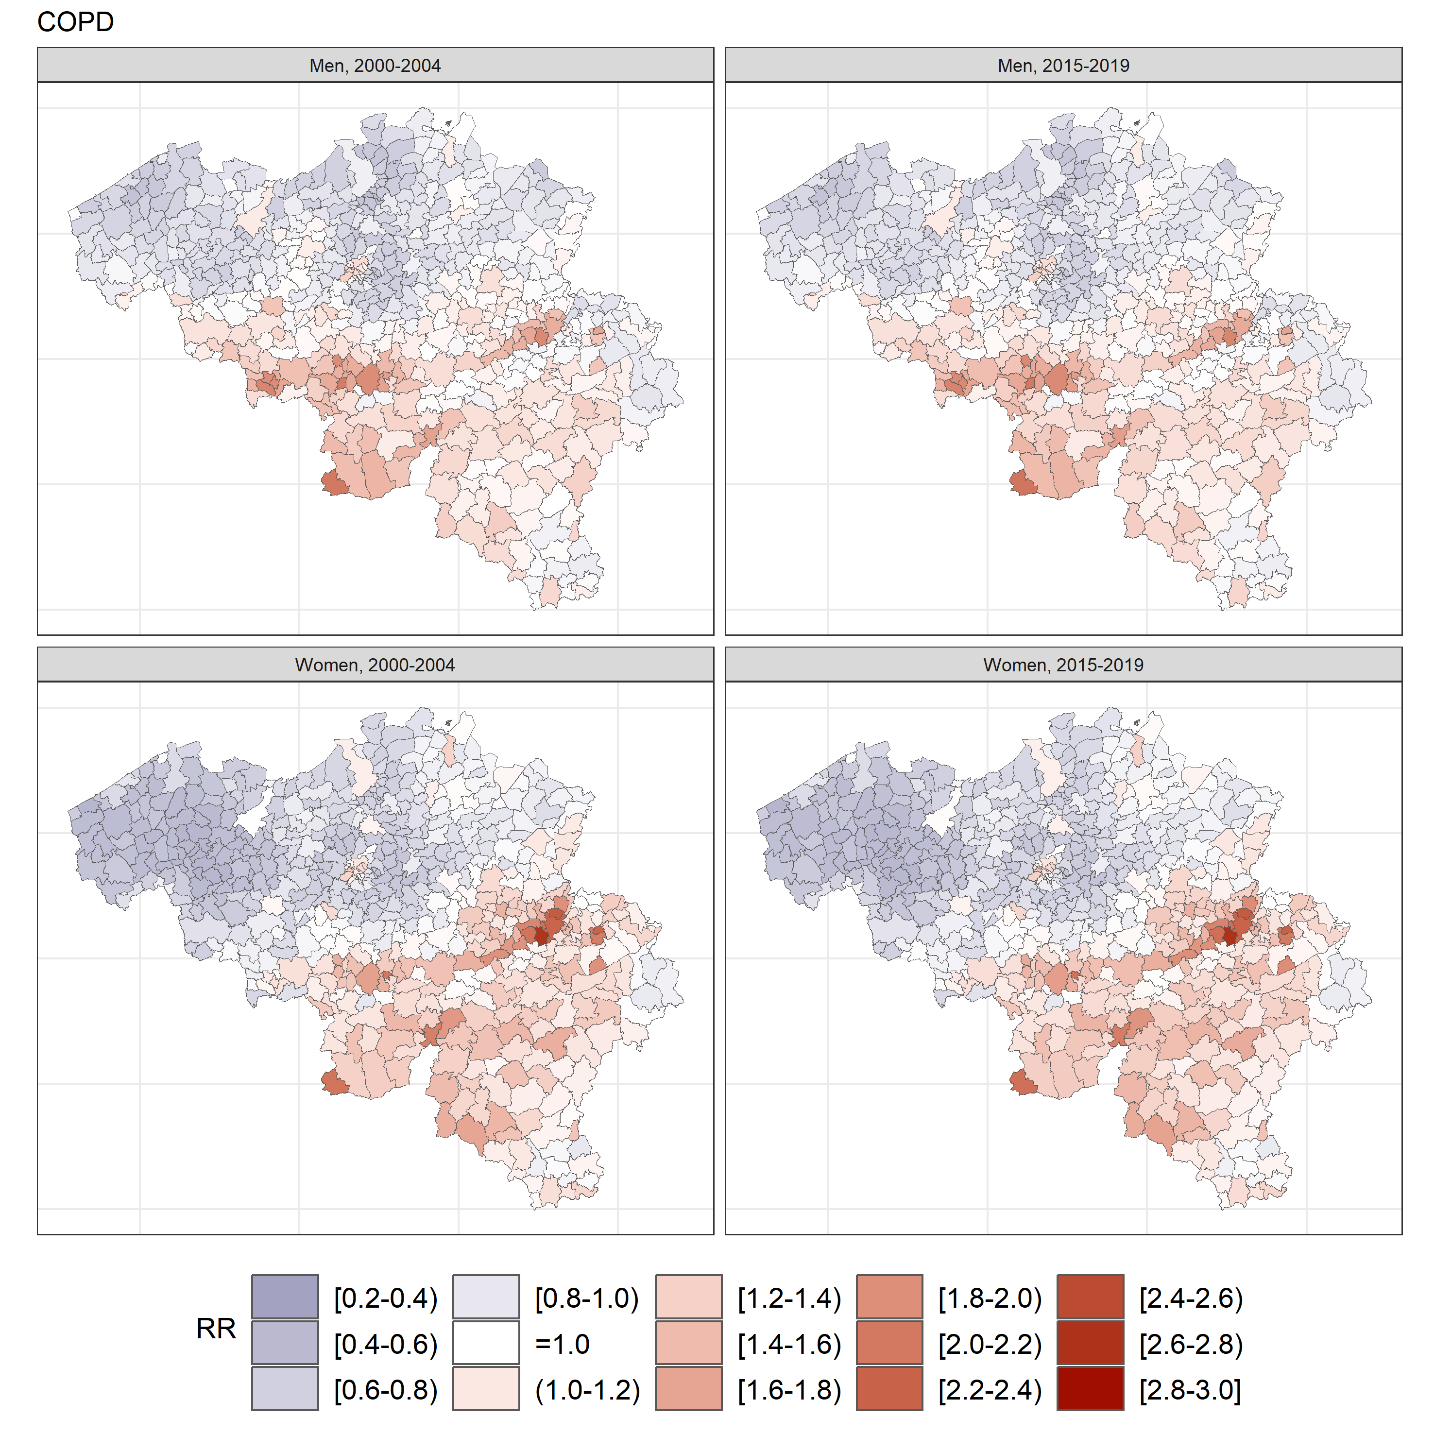


Figure S5 Spatial and temporal distribution of RR of premature mortality due to COPD in Belgium in the first (2000-2004) and last period (2015-2019) studied, by sex.


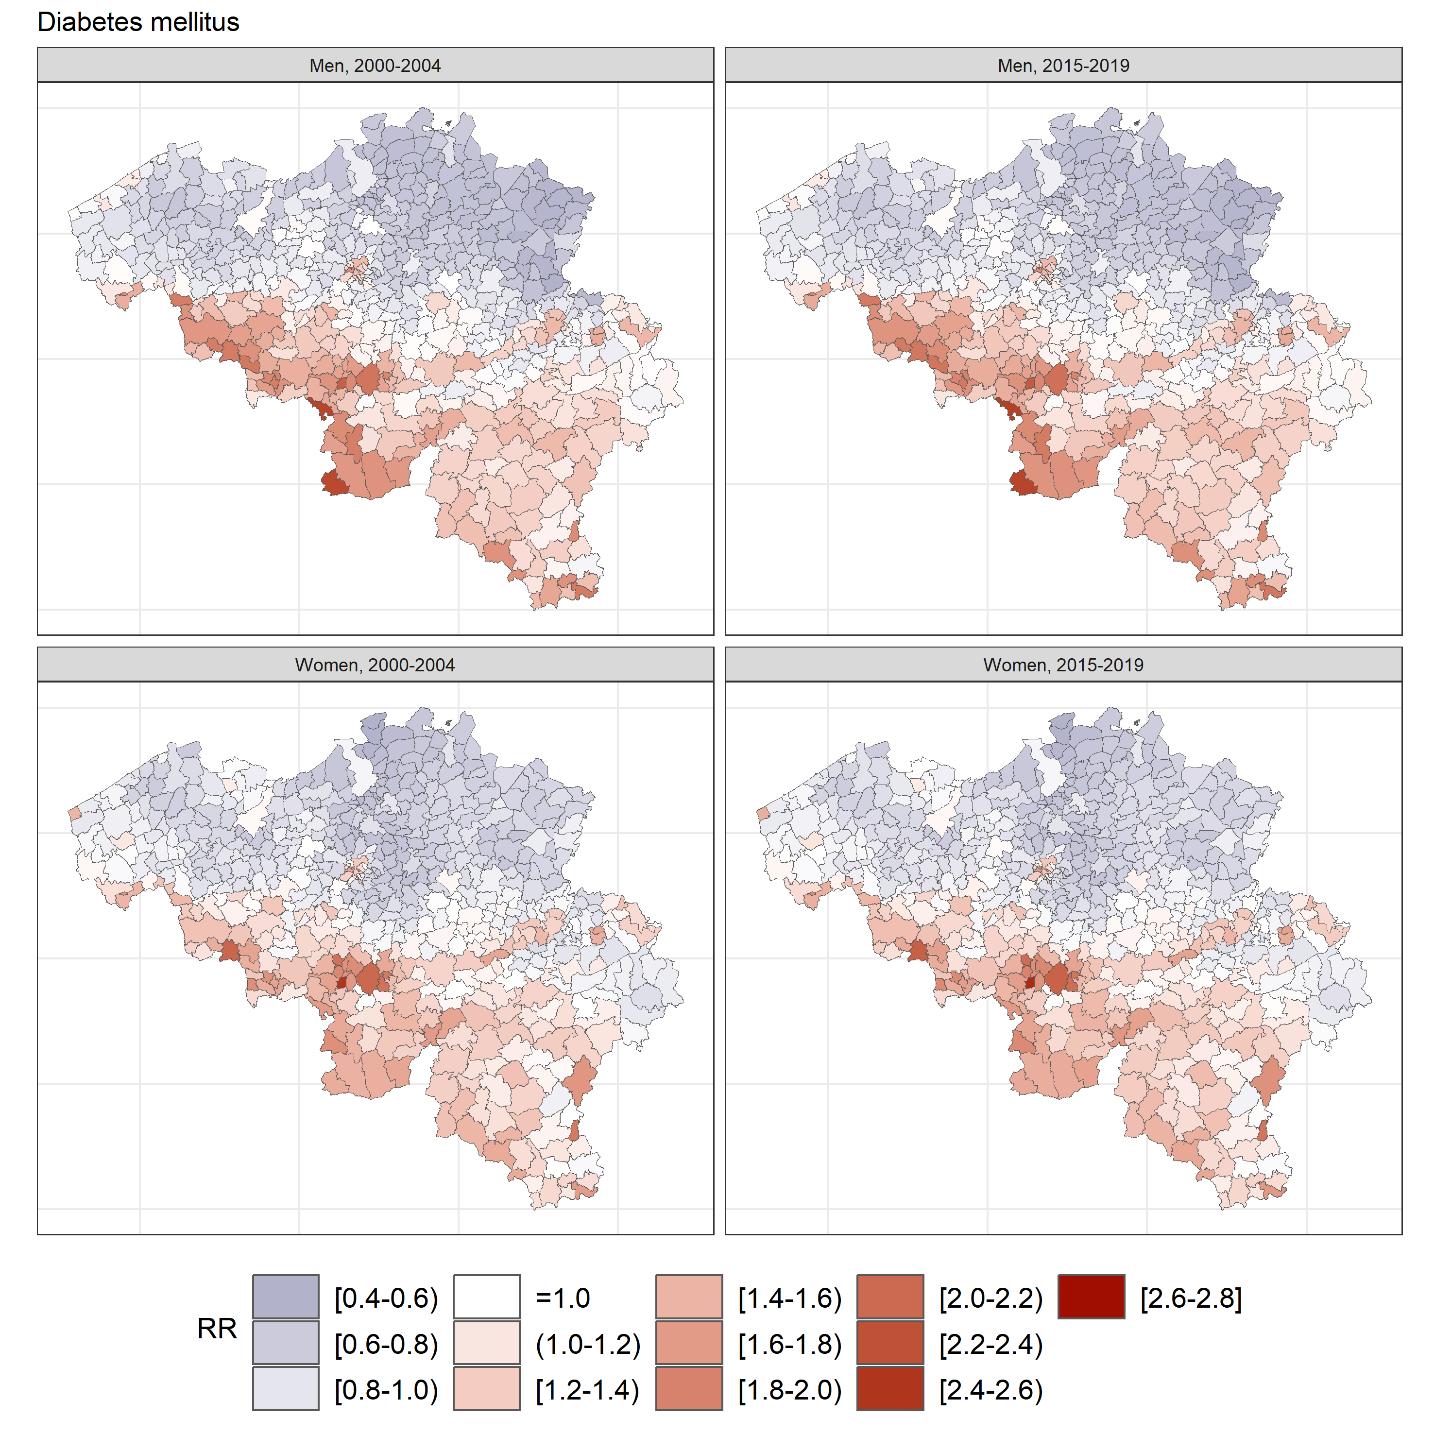


Figure S6 Spatial and temporal distribution of RR of premature mortality due to diabetes mellitus in Belgium in the first (2000-2004) and last period (2015-2019) studied, by sex.


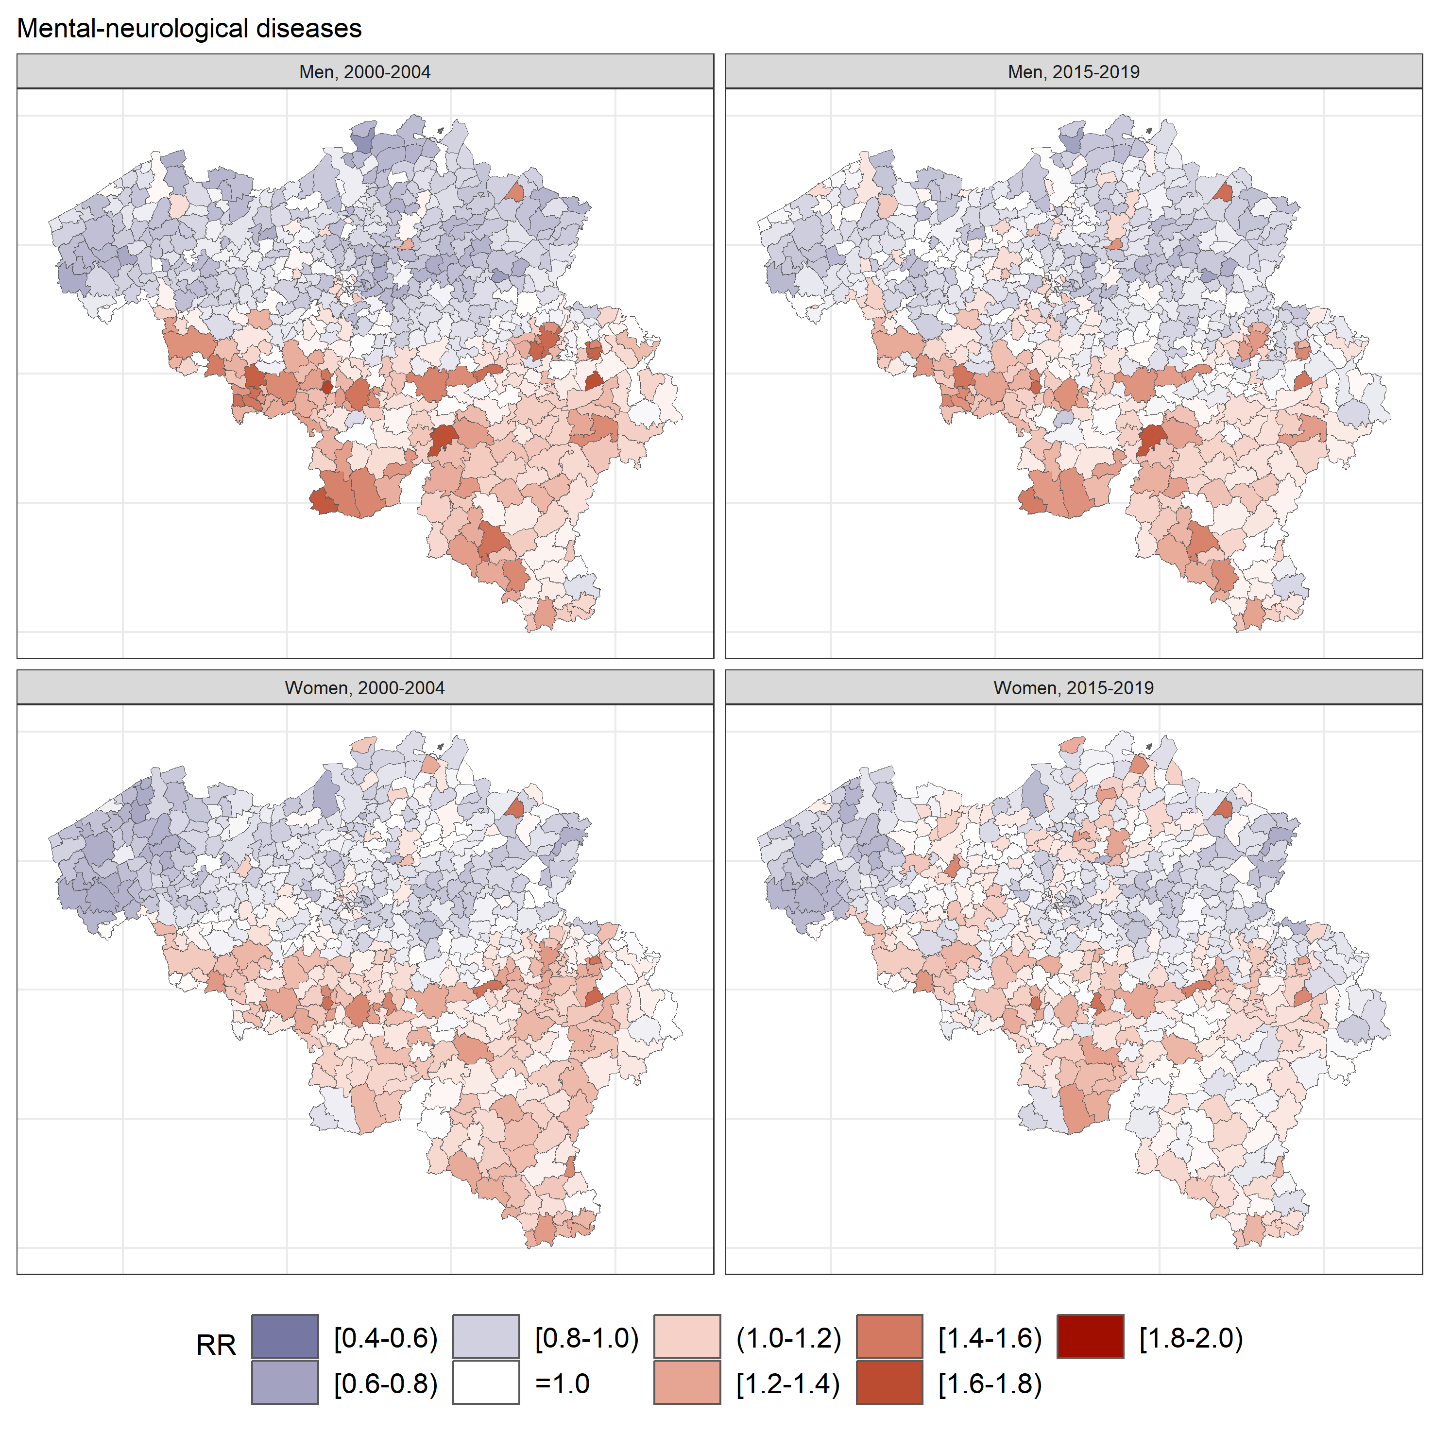


Figure S7Spatial and temporal distribution of RR of premature mortality due to mental and neurological diseases in Belgium in the first (2000-2004) and last period (2015-2019) studied, by sex.


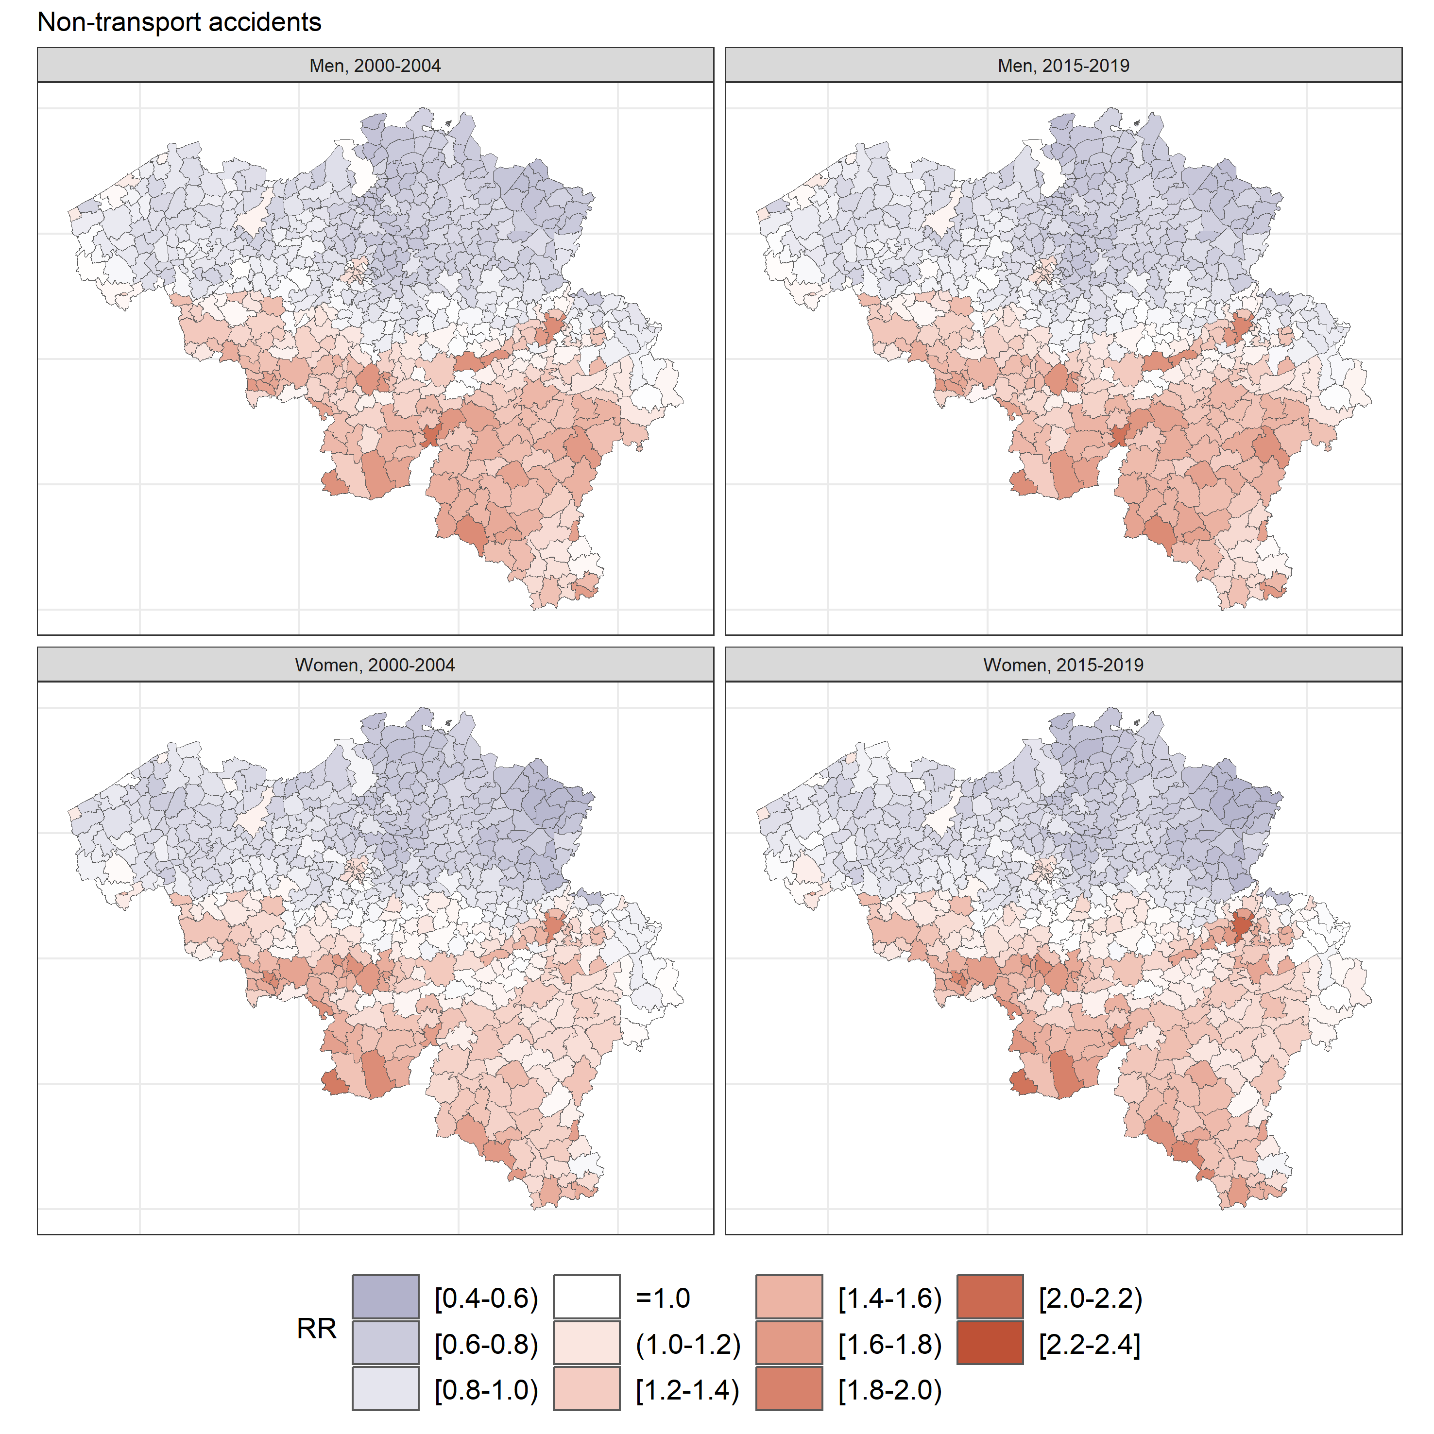


Figure S8Spatial and temporal distribution of RR of premature mortality due to non-transport accidents in Belgium in the first (2000-2004) and last period (2015-2019) studied, by sex.


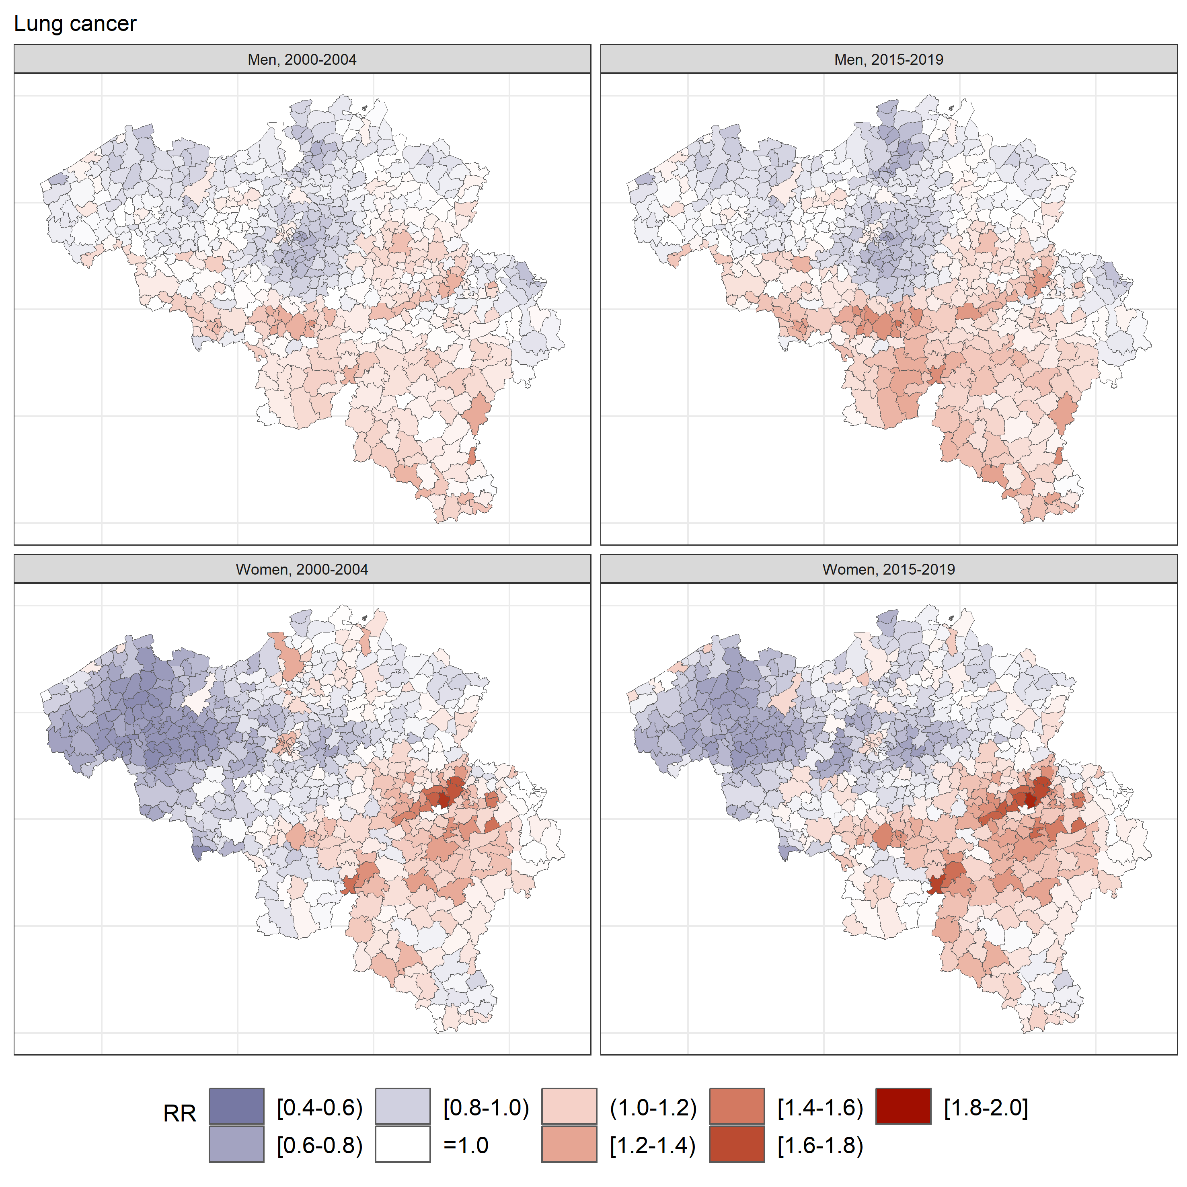


Figure S9 Spatial and temporal distribution of RR of premature mortality due to lung cancer in Belgium in the first (2000-2004) and last period (2015-2019) studied, by sex.


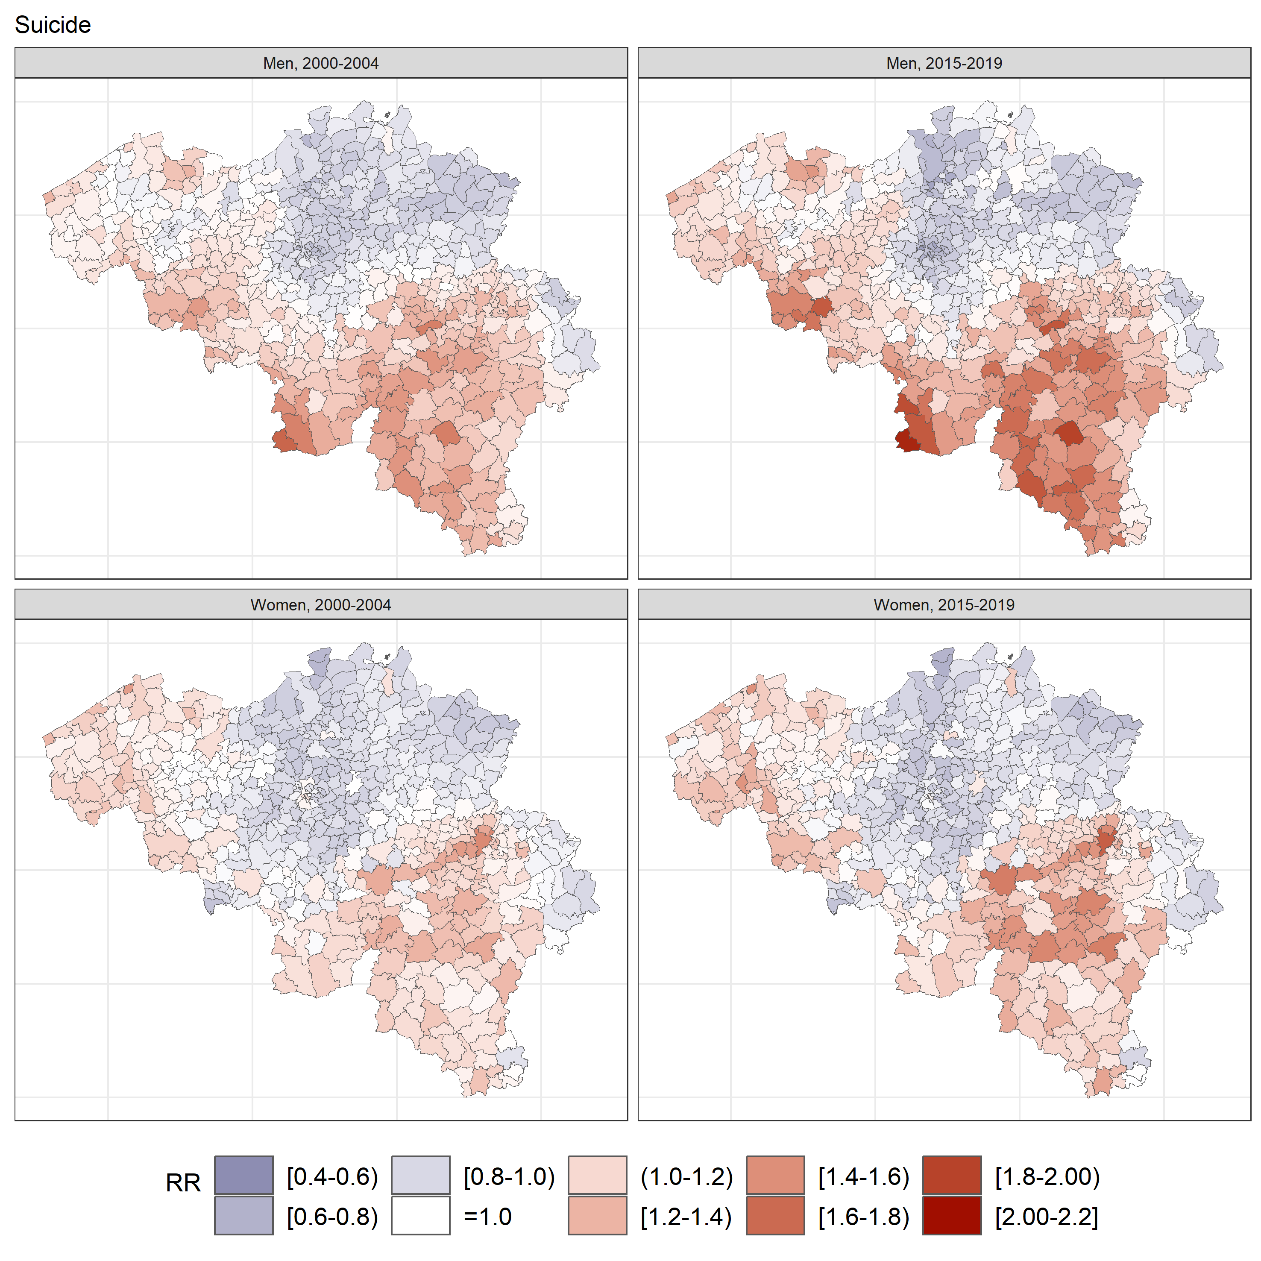


Figure S10 Spatial and temporal distribution of RR of premature mortality due to suicide in Belgium in the first (2000-2004) and last period (2015-2019) studied, by sex.


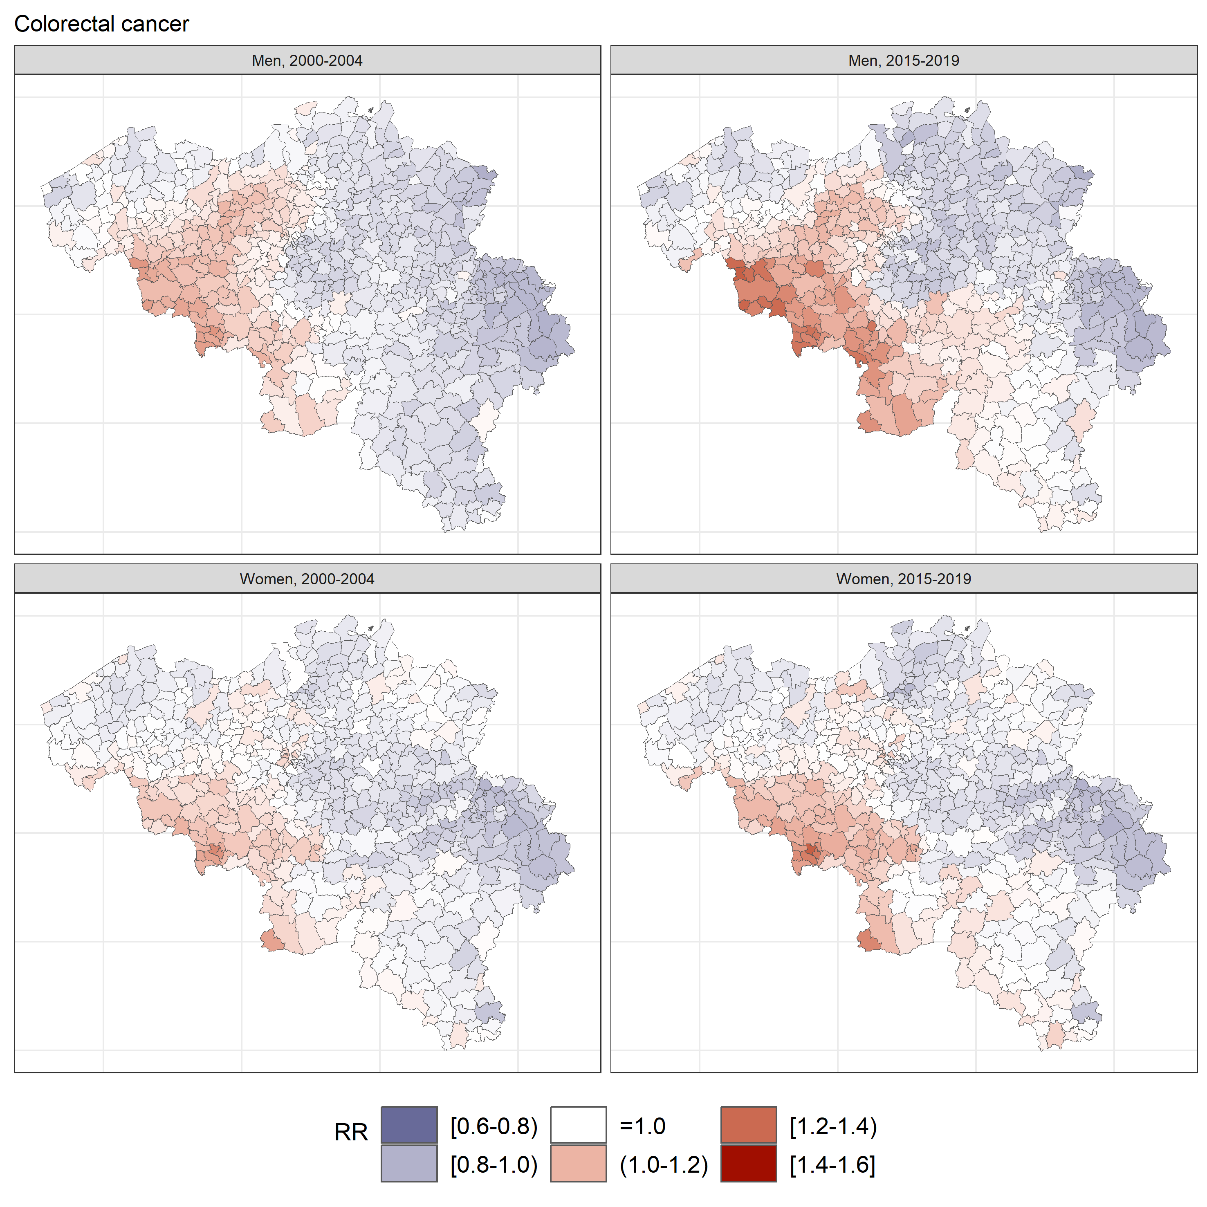


Figure S11 Spatial and temporal distribution of RR of premature mortality due to colorectal cancer in Belgium in the first (2000-2004) and last period (2015-2019) studied, by sex.

## Is the subnational variation in cause-specific risk of premature death decreasing or increasing?

Table S2 Overview of estimated standard deviation of relative risk of dying prematurely by cause of death and period, men

| **Cause of death** | **2000-2004** | **2005-2009** | **2010-2014** | **2015-2019** |
| --- | --- | --- | --- | --- |
| Premature mortality | 0.035 (95%CI, 0.034-0.037) | 0.035 (95%CI, 0.033-0.036) | 0.036 (95%CI, 0.035-0.038) | 0.04 (95%CI, 0.038-0.042) |
| Alcohol-related deaths | 0.126 (95%CI, 0.12-0.132) | 0.126 (95%CI, 0.12-0.132) | 0.127 (95%CI, 0.122-0.133) | 0.129 (95%CI, 0.124-0.136) |
| Cardiovascular diseases | 0.065 (95%CI, 0.063-0.067) | 0.066 (95%CI, 0.064-0.068) | 0.072 (95%CI, 0.069-0.074) | 0.081 (95%CI, 0.078-0.085) |
| Cerebrovascular diseases | 0.082 (95%CI, 0.08-0.084) | 0.083 (95%CI, 0.081-0.085) | 0.088 (95%CI, 0.085-0.09) | 0.095 (95%CI, 0.092-0.097) |
| Colorectal cancer | 0.08 (95%CI, 0.079-0.081) | 0.081 (95%CI, 0.08-0.082) | 0.087 (95%CI, 0.085-0.088) | 0.095 (95%CI, 0.094-0.097) |
| COPD | 0.11 (95%CI, 0.106-0.114) | 0.111 (95%CI, 0.106-0.114) | 0.112 (95%CI, 0.107-0.116) | 0.114 (95%CI, 0.11-0.118) |
| Diabetes mellitus | 0.149 (95%CI, 0.142-0.155) | 0.149 (95%CI, 0.142-0.156) | 0.151 (95%CI, 0.143-0.157) | 0.153 (95%CI, 0.148-0.161) |
| Lung cancer | 0.071 (95%CI, 0.07-0.073) | 0.071 (95%CI, 0.069-0.073) | 0.074 (95%CI, 0.072-0.076) | 0.079 (95%CI, 0.077-0.081) |
| Mental-neurological diseases | 0.135 (95%CI, 0.131-0.14) | 0.136 (95%CI, 0.132-0.139) | 0.139 (95%CI, 0.137-0.144) | 0.145 (95%CI, 0.143-0.149) |
| Mouth cancer | 0.116 (95%CI, 0.113-0.12) | 0.116 (95%CI, 0.113-0.119) | 0.119 (95%CI, 0.116-0.122) | 0.124 (95%CI, 0.121-0.126) |
| Non-transport accidents | 0.104 (95%CI, 0.099-0.109) | 0.105 (95%CI, 0.1-0.109) | 0.108 (95%CI, 0.102-0.111) | 0.111 (95%CI, 0.105-0.115) |
| Road accidents | 0.182 (95%CI, 0.172-0.192) | 0.182 (95%CI, 0.172-0.192) | 0.187 (95%CI, 0.174-0.194) | 0.193 (95%CI, 0.183-0.204) |
| Suicide | 0.104 (95%CI, 0.101-0.108) | 0.107 (95%CI, 0.104-0.111) | 0.116 (95%CI, 0.113-0.121) | 0.133 (95%CI, 0.128-0.137) |

Table S3 Overview of estimated standard deviation of relative risk of dying prematurely by cause of death and period, women

| **Cause of death** | **2000-2004** | **2005-2009** | **2010-2014** | **2015-2019** |
| --- | --- | --- | --- | --- |
| Premature mortality | 0.04 (95%CI, 0.039-0.041) | 0.04 (95%CI, 0.039-0.041) | 0.041 (95%CI, 0.04-0.043) | 0.044 (95%CI, 0.043-0.046) |
| Alcohol-related deaths | 0.169 (95%CI, 0.163-0.174) | 0.169 (95%CI, 0.163-0.174) | 0.171 (95%CI, 0.165-0.176) | 0.174 (95%CI, 0.167-0.18) |
| Breast cancer | 0.062 (95%CI, 0.06-0.062) | 0.066 (95%CI, 0.065-0.067) | 0.074 (95%CI, 0.074-0.076) | 0.085 (95%CI, 0.084-0.086) |
| Cardiovascular diseases | 0.079 (95%CI, 0.077-0.082) | 0.081 (95%CI, 0.079-0.084) | 0.087 (95%CI, 0.083-0.09) | 0.094 (95%CI, 0.092-0.098) |
| Cerebrovascular diseases | 0.099 (95%CI, 0.096-0.1) | 0.103 (95%CI, 0.101-0.105) | 0.111 (95%CI, 0.109-0.113) | 0.123 (95%CI, 0.121-0.126) |
| Colorectal cancer | 0.074 (95%CI, 0.073-0.075) | 0.077 (95%CI, 0.076-0.078) | 0.085 (95%CI, 0.084-0.086) | 0.096 (95%CI, 0.095-0.097) |
| COPD | 0.13 (95%CI, 0.122-0.138) | 0.13 (95%CI, 0.123-0.138) | 0.132 (95%CI, 0.124-0.14) | 0.134 (95%CI, 0.127-0.143) |
| Diabetes mellitus | 0.165 (95%CI, 0.157-0.17) | 0.165 (95%CI, 0.157-0.17) | 0.168 (95%CI, 0.16-0.174) | 0.172 (95%CI, 0.164-0.179) |
| Lung cancer | 0.102 (95%CI, 0.098-0.105) | 0.102 (95%CI, 0.099-0.106) | 0.104 (95%CI, 0.1-0.108) | 0.11 (95%CI, 0.107-0.115) |
| Mental-neurological diseases | 0.145 (95%CI, 0.141-0.15) | 0.147 (95%CI, 0.144-0.15) | 0.155 (95%CI, 0.15-0.158) | 0.167 (95%CI, 0.162-0.171) |
| Mouth cancer | 0.082 (95%CI, 0.08-0.085) | 0.088 (95%CI, 0.086-0.089) | 0.101 (95%CI, 0.099-0.104) | 0.122 (95%CI, 0.118-0.126) |
| Non-transport accidents | 0.131 (95%CI, 0.124-0.136) | 0.132 (95%CI, 0.125-0.137) | 0.137 (95%CI, 0.13-0.144) | 0.145 (95%CI, 0.138-0.154) |
| Road accidents | 0.243 (95%CI, 0.236-0.255) | 0.246 (95%CI, 0.233-0.256) | 0.256 (95%CI, 0.246-0.268) | 0.273 (95%CI, 0.26-0.286) |
| Suicide | 0.126 (95%CI, 0.122-0.129) | 0.132 (95%CI, 0.128-0.135) | 0.149 (95%CI, 0.144-0.152) | 0.171 (95%CI, 0.165-0.174) |

##

## What effects do overall socioeconomic deprivation or domain-specific deprivation have on subnational variations in the cause-specific risk of premature death?

Table S4 Overview of estimated posterior all-cause and cause-specific RR of dying prematurely associated with an increase of overall average deprivation score by 10.04 units, for men.

| **Cause of death** | **RR in %** |
| --- | --- |
| All-cause premature mortality | 13.28 (95%CI,13.17-13.39) |
| Alcohol-related deaths | 22.05 (95%CI,21.68-22.42) |
| Cerebrovascular diseases | 12.54 (95%CI,12.31-12.77) |
| Suicide | 5.36 (95%CI,5.12-5.61) |
| Colorectal cancer | 2.57 (95%CI,2.35-2.78) |
| COPD | 22.61 (95%CI,22.3-22.92) |
| Mouth cancer | 14.04 (95%CI,13.72-14.36) |
| Non-transport accidents | 20.26 (95%CI,19.96-20.56) |
| Mental-neurological diseases | 12.98 (95%CI,12.64-13.32) |
| Lung cancer | 10.35 (95%CI,10.18-10.52) |
| Road accidents | -3.09 (95%CI,-3.42--2.76) |
| Diabetes mellitus | 22.61 (95%CI,22.16-23.06) |
| Cardiovascular diseases | 13.43 (95%CI,13.26-13.6) |

Table S5 Overview of estimated posterior all-cause and cause-specific RR of dying prematurely associated with an increase of overall average deprivation score by 10.04 units, for women.

| **Cause of death** | **RR in %** |
| --- | --- |
| All-cause premature mortality | 12.51 (95%CI,12.4-12.61) |
| Alcohol-related deaths | 23.28 (95%CI,22.78-23.78) |
| Breast cancer | 1.21 (95%CI,1.05-1.38) |
| Cerebrovascular diseases | 12.1 (95%CI,11.83-12.36) |
| Suicide | 7.92 (95%CI,7.6-8.25) |
| Colorectal cancer | 4.39 (95%CI,4.15-4.64) |
| COPD | 27 (95%CI,26.6-27.4) |
| Mouth cancer | 18.55 (95%CI,18.14-18.96) |
| Non-transport accidents | 19.51 (95%CI,19.11-19.9) |
| Mental-neurological diseases | 8.68 (95%CI,8.33-9.03) |
| Lung cancer | 16.52 (95%CI,16.25-16.8) |
| Road accidents | -4.7 (95%CI,-5.15--4.24) |
| Diabetes mellitus | 23.55 (95%CI,23.02-24.07) |
| Cardiovascular diseases | 16.2 (95%CI,15.99-16.42) |

Table S6 Overview of estimated posterior all-cause and cause-specific RR of dying prematurely associated with an increase of domain-specific average deprivation score by 10.04 units, for men.

| **Cause of death** | **Domain** | **RR in %** |
| --- | --- | --- |
| All-cause premature mortality |  |  |
|  | education | 7.37 (95%CI,7.3-7.44) |
|  | employment | 10.45 (95%CI,10.36-10.54) |
|  | income | 7.05 (95%CI,6.94-7.15) |
|  | housing | 9.14 (95%CI,8.99-9.28) |
|  | crime | 3.4 (95%CI,3.36-3.45) |
| Suicide |  |  |
|  | education | 2.2 (95%CI,2.06-2.35) |
|  | employment | 4.51 (95%CI,4.31-4.7) |
|  | income | 2.69 (95%CI,2.5-2.87) |
|  | housing | 7.38 (95%CI,7.12-7.64) |
|  | crime | 2.31 (95%CI,2.22-2.39) |
| Lung cancer |  |  |
|  | education | 2.2 (95%CI,2.06-2.35) |
|  | employment | 4.51 (95%CI,4.31-4.7) |
|  | income | 2.69 (95%CI,2.5-2.87) |
|  | housing | 7.38 (95%CI,7.12-7.64) |
|  | crime | 2.31 (95%CI,2.22-2.39) |
| Road accidents |  |  |
|  | education | -1.95 (95%CI,-2.16--1.75) |
|  | employment | 0.37 (95%CI,0.09-0.64) |
|  | income | -5.55 (95%CI,-5.79--5.3) |
|  | housing | 8.53 (95%CI,8.12-8.93) |
|  | crime | -2.13 (95%CI,-2.25--2) |
| Non-transport accidents |  |  |
|  | education | 10.7 (95%CI,10.52-10.88) |
|  | employment | 14.39 (95%CI,14.14-14.64) |
|  | income | 13.07 (95%CI,12.84-13.3) |
|  | housing | 14.2 (95%CI,13.83-14.58) |
|  | crime | 6.49 (95%CI,6.38-6.6) |
| Mental-neurological diseases |  |  |
|  | education | 7.16 (95%CI,6.96-7.36) |
|  | employment | 9.86 (95%CI,9.61-10.11) |
|  | income | 7.43 (95%CI,7.17-7.7) |
|  | housing | 6.23 (95%CI,5.88-6.58) |
|  | crime | 4.71 (95%CI,4.58-4.83) |
| Mouth cancer |  |  |
|  | education | 7.61 (95%CI,7.42-7.79) |
|  | employment | 11.62 (95%CI,11.35-11.88) |
|  | income | 7.54 (95%CI,7.3-7.77) |
|  | housing | 10.59 (95%CI,10.25-10.93) |
|  | crime | 4.36 (95%CI,4.26-4.47) |
| Diabetes mellitus |  |  |
|  | education | 12.58 (95%CI,12.32-12.83) |
|  | employment | 16.7 (95%CI,16.33-17.07) |
|  | income | 14.32 (95%CI,13.98-14.65) |
|  | housing | 15.18 (95%CI,14.64-15.72) |
|  | crime | 6.69 (95%CI,6.52-6.86) |
| COPD |  |  |
|  | education | 12.71 (95%CI,12.53-12.89) |
|  | employment | 18.18 (95%CI,17.93-18.42) |
|  | income | 12.95 (95%CI,12.69-13.21) |
|  | housing | 17.18 (95%CI,16.81-17.55) |
|  | crime | 5.98 (95%CI,5.86-6.1) |
| Colorectal cancer |  |  |
|  | education | 1.55 (95%CI,1.42-1.68) |
|  | employment | 2.69 (95%CI,2.51-2.87) |
|  | income | -0.22 (95%CI,-0.38--0.07) |
|  | housing | 5.23 (95%CI,5-5.47) |
|  | crime | 0.89 (95%CI,0.8-0.98) |
| Cerebrovascular diseases |  |  |
|  | education | 7.02 (95%CI,6.89-7.16) |
|  | employment | 10.29 (95%CI,10.11-10.48) |
|  | income | 6.48 (95%CI,6.29-6.66) |
|  | housing | 9.97 (95%CI,9.71-10.24) |
|  | crime | 3.41 (95%CI,3.32-3.5) |
| Cardiovascular diseases |  |  |
|  | education | 7.56 (95%CI,7.46-7.66) |
|  | employment | 10.55 (95%CI,10.41-10.69) |
|  | income | 7.25 (95%CI,7.1-7.39) |
|  | housing | 9.68 (95%CI,9.49-9.88) |
|  | crime | 3.66 (95%CI,3.6-3.73) |
| Alcohol-related deaths |  |  |
|  | education | 11.79 (95%CI,11.57-12) |
|  | employment | 17.79 (95%CI,17.5-18.08) |
|  | income | 13.05 (95%CI,12.77-13.32) |
|  | housing | 13.78 (95%CI,13.37-14.2) |
|  | crime | 6.95 (95%CI,6.82-7.07) |

Table S7 Overview of estimated posterior all-cause and cause-specific RR of dying prematurely associated with an increase of domain-specific average deprivation score by 10.04 units, for women.

| **Mortality** | **Domain** | **RR in %** |
| --- | --- | --- |
| Premature mortality |  |  |
|  | education | 7.11 (95%CI,7.04-7.18) |
|  | employment | 9.87 (95%CI,9.78-9.96) |
|  | income | 7.34 (95%CI,7.24-7.44) |
|  | housing | 7.68 (95%CI,7.53-7.83) |
|  | crime | 3.19 (95%CI,3.15-3.24) |
| Suicide |  |  |
|  | education | 3.47 (95%CI,3.28-3.67) |
|  | employment | 5.62 (95%CI,5.35-5.89) |
|  | income | 6.56 (95%CI,6.31-6.8) |
|  | housing | 1.9 (95%CI,1.54-2.26) |
|  | crime | 4.43 (95%CI,4.31-4.55) |
| Lung cancer |  |  |
|  | education | 9.26 (95%CI,9.1-9.42) |
|  | employment | 13.61 (95%CI,13.38-13.84) |
|  | income | 10.25 (95%CI,10.04-10.47) |
|  | housing | 5.93 (95%CI,5.6-6.27) |
|  | crime | 5.53 (95%CI,5.43-5.63) |
| Road accidents |  |  |
|  | education | -3.03 (95%CI,-3.31--2.75) |
|  | employment | -0.76 (95%CI,-1.16--0.37) |
|  | income | -5.48 (95%CI,-5.82--5.13) |
|  | housing | 10.28 (95%CI,9.71-10.86) |
|  | crime | -2.43 (95%CI,-2.61--2.25) |
| Non-transport accidents |  |  |
|  | education | 10 (95%CI,9.77-10.23) |
|  | employment | 16.46 (95%CI,16.15-16.78) |
|  | income | 12.27 (95%CI,11.98-12.56) |
|  | housing | 11.98 (95%CI,11.51-12.45) |
|  | crime | 6.42 (95%CI,6.27-6.56) |
| Mental-neurological diseases |  |  |
|  | education | 4.57 (95%CI,4.37-4.78) |
|  | employment | 7.15 (95%CI,6.89-7.41) |
|  | income | 4.67 (95%CI,4.41-4.93) |
|  | housing | 4.89 (95%CI,4.54-5.25) |
|  | crime | 3.25 (95%CI,3.12-3.38) |
| Mouth cancer |  |  |
|  | education | 9.34 (95%CI,9.1-9.58) |
|  | employment | 11.52 (95%CI,11.17-11.86) |
|  | income | 11.16 (95%CI,10.87-11.45) |
|  | housing | 10.43 (95%CI,9.91-10.94) |
|  | crime | 5.86 (95%CI,5.7-6.03) |
| Diabetes mellitus |  |  |
|  | education | 14.31 (95%CI,14.01-14.61) |
|  | employment | 17.23 (95%CI,16.82-17.65) |
|  | income | 12.46 (95%CI,12.05-12.86) |
|  | housing | 22.85 (95%CI,22.24-23.46) |
|  | crime | 5.43 (95%CI,5.22-5.64) |
| COPD |  |  |
|  | education | 15.46 (95%CI,15.23-15.69) |
|  | employment | 21.98 (95%CI,21.66-22.31) |
|  | income | 15.4 (95%CI,15.08-15.73) |
|  | housing | 14.58 (95%CI,14.06-15.1) |
|  | crime | 8.3 (95%CI,8.14-8.45) |
| Colorectal cancer |  |  |
|  | education | 2.62 (95%CI,2.48-2.77) |
|  | employment | 1.27 (95%CI,1.1-1.44) |
|  | income | 1.27 (95%CI,1.1-1.44) |
|  | housing | 5.29 (95%CI,5.05-5.54) |
|  | crime | 1.35 (95%CI,1.25-1.46) |
| Cerebrovascular diseases |  |  |
|  | education | 7.17 (95%CI,7.02-7.33) |
|  | employment | 10.5 (95%CI,10.29-10.71) |
|  | income | 5.78 (95%CI,5.57-5.99) |
|  | housing | 10.62 (95%CI,10.3-10.94) |
|  | crime | 3.01 (95%CI,2.91-3.12) |
| Cardiovascular diseases |  |  |
|  | education | 9.29 (95%CI,9.17-9.41) |
|  | employment | 12.97 (95%CI,12.8-13.15) |
|  | income | 8.79 (95%CI,8.6-8.97) |
|  | housing | 12.79 (95%CI,12.52-13.05) |
|  | crime | 4.08 (95%CI,4-4.16) |
| Breast cancer |  |  |
|  | education | 0.66 (95%CI,0.56-0.76) |
|  | employment | 1.09 (95%CI,0.96-1.22) |
|  | income | 0.06 (95%CI,-0.06-0.18) |
|  | housing | 2.55 (95%CI,2.38-2.73) |
|  | crime | 0.35 (95%CI,0.29-0.42) |
| Alcohol-related deaths |  |  |
|  | education | 12.82 (95%CI,12.53-13.1) |
|  | employment | 18.2 (95%CI,17.81-18.6) |
|  | income | 13.27 (95%CI,12.9-13.64) |
|  | housing | 17.12 (95%CI,16.56-17.67) |
|  | crime | 6.75 (95%CI,6.58-6.93) |
